# Supplementary material for: Low-Power and Eco-Friendly Temperature Sensor Based on Gelatin Nanocomposite
Source: MDPI journal article supplement (doi:10.3390/nano12132227), 2022-06-29
Supplement: s1 [file s1]

# Low-Power and Eco-Friendly Temperature Sensor Based on Gelatin Nanocomposite

Giovanni Landi <sup>1,\*</sup>, Veronica Granata <sup>2,3</sup>, Roberto Germano <sup>4</sup>, Sergio Pagano <sup>2,3,5</sup> and Carlo Barone <sup>2,3,5,\*</sup>

<sup>1</sup> ENEA, Casaccia Research Center, Via Anguillarese 301, 00123 Rome, Italy

<sup>2</sup> Dipartimento di Fisica “E.R. Caianiello”, Università degli Studi di Salerno, 84084 Fisciano, SA, Italy; vgranata@unisa.it (V.G.); spagano@unisa.it (S.P.)

<sup>3</sup> INFN Gruppo Collegato di Salerno, c/o Università degli Studi di Salerno, 84084 Fisciano, SA, Italy

<sup>4</sup> PROMETE Srl, CNR Spin off, P.le V. Tecchio, 45, 80125 Naples, Italy; germano@promete.it

<sup>5</sup> CNR-SPIN, c/o Università degli Studi di Salerno, 84084 Fisciano, SA, Italy

\* Correspondence: giovanni.land@enea.it (G.L.); cbarone@unisa.it (C.B.)

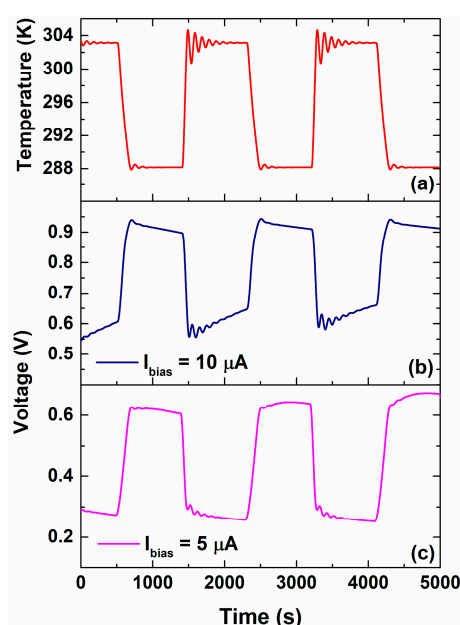

**Figure S1.** Time evolutions of the (a) square wave temperature profile imposed to the sample between 288 and 303 K and corresponding voltage signals, measured during the temperature stress, at a bias current values of (b) 10 and (c) 5  $\mu A$ , respectively.

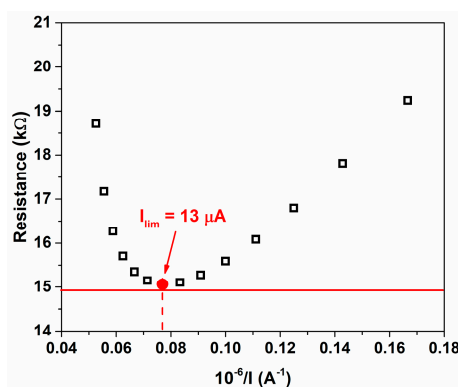

**Figure S2.** Determination of the limiting current value by using the method of Cowan and Brow.

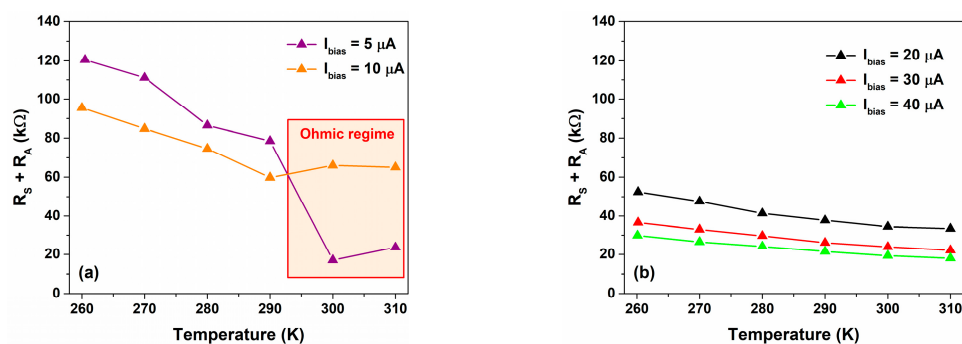

**Figure S3.** Variation of the sum of ohmic contributions  $R_S + R_A$  extracted from the fitting procedure as a function of the temperature for bias current values (a) lower and higher than the limiting current of  $13 \mu\text{A}$ , respectively.

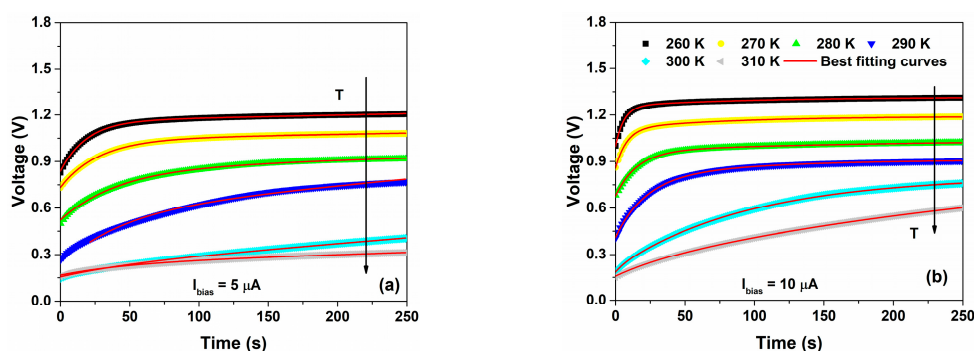

**Figure S4.** Time evolution of the voltage measured across the device under operating conditions at (a)  $5 \mu\text{A}$  and (b)  $10 \mu\text{A}$  as a function of the temperature between 260 and 310 K, respectively. The best fitting curves, using equation (5), are shown as red solid lines.

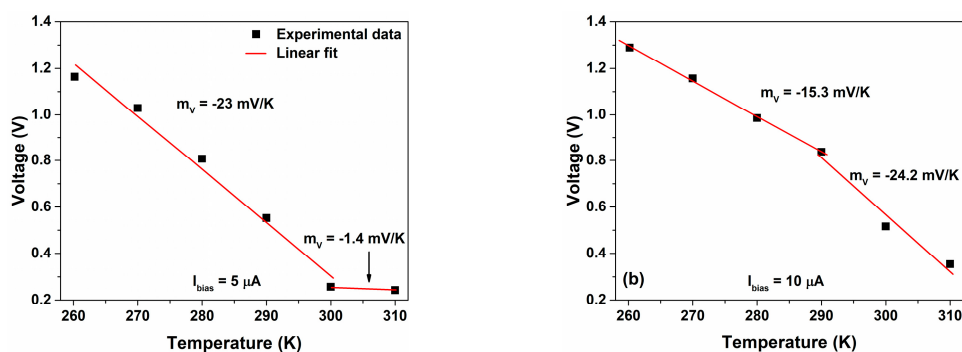

**Figure S5.** Variation of the voltage measured across the sensor as a function of the temperature for bias current values of (a)  $5 \mu\text{A}$  and (b)  $10 \mu\text{A}$ , respectively. The red solid lines represent the linear fit.

**Table S1.** Device performances as a function of the bias current at 260 K.

| <b>Bias current<br/>(<math>\mu\text{A}</math>)</b> | <b>Speed Response <math>\Delta\tau</math><br/>(s)</b> | <b>Power consumption<br/>(mW)</b> |
|----------------------------------------------------|-------------------------------------------------------|-----------------------------------|
| 5(*)                                               | 74.5                                                  | 0.11                              |
| 10(*)                                              | 24.5                                                  | 0.08                              |
| 20                                                 | 23.1                                                  | 0.17                              |
| 30                                                 | 11.8                                                  | 0.14                              |
| 40                                                 | 10.4                                                  | 0.17                              |

\* Temperature sensor in ohmic regime.

**Table S2.** Device performances as a function of the bias current at 270 K.

| <b>Bias current<br/>(<math>\mu\text{A}</math>)</b> | <b>Speed Response <math>\Delta\tau</math><br/>(s)</b> | <b>Power consumption<br/>(mW)</b> |
|----------------------------------------------------|-------------------------------------------------------|-----------------------------------|
| 5(*)                                               | 111.6                                                 | 0.15                              |
| 10(*)                                              | 31.6                                                  | 0.09                              |
| 20                                                 | 27.6                                                  | 0.18                              |
| 30                                                 | 14.5                                                  | 0.15                              |
| 40                                                 | 11.5                                                  | 0.16                              |

\* Temperature sensor in ohmic regime.

**Table S3.** Device performances as a function of the bias current at 280 K.

| <b>Bias current<br/>(<math>\mu\text{A}</math>)</b> | <b>Speed Response <math>\Delta\tau</math><br/>(s)</b> | <b>Power consumption<br/>(mW)</b> |
|----------------------------------------------------|-------------------------------------------------------|-----------------------------------|
| 5(*)                                               | 167.0                                                 | 0.19                              |
| 10(*)                                              | 63.0                                                  | 0.16                              |
| 20                                                 | 33.9                                                  | 0.20                              |
| 30                                                 | 19.3                                                  | 0.18                              |
| 40                                                 | 16.3                                                  | 0.21                              |

\* Temperature sensor in ohmic regime.

**Table S4.** Device performances as a function of the bias current at 290 K.

| <b>Bias current<br/>(<math>\mu\text{A}</math>)</b> | <b>Speed Response <math>\Delta\tau</math><br/>(s)</b> | <b>Power consumption<br/>(mW)</b> |
|----------------------------------------------------|-------------------------------------------------------|-----------------------------------|
| 5(*)                                               | 184.0                                                 | --                                |
| 10(*)                                              | 84.2                                                  | 0.19                              |
| 20                                                 | 50.6                                                  | 0.26                              |
| 30                                                 | 30.6                                                  | 0.25                              |
| 40                                                 | 21.9                                                  | 0.26                              |

\* Temperature sensor in ohmic regime.

**Table S5.** Device performances as a function of the bias current at 300 K.

| <b>Bias current<br/>(<math>\mu\text{A}</math>)</b> | <b>Speed Response <math>\Delta\tau</math><br/>(s)</b> | <b>Power consumption<br/>(mW)</b> |
|----------------------------------------------------|-------------------------------------------------------|-----------------------------------|
| 5(*)                                               | 214.9                                                 | --                                |
| 10(*)                                              | 370.6                                                 | 0.70                              |
| 20                                                 | 83.7                                                  | 0.38                              |
| 30                                                 | 47.7                                                  | 0.35                              |
| 40                                                 | 29.5                                                  | 0.31                              |

\* Temperature sensor in ohmic regime.

**Table S6.** Device performances as a function of the bias current at 310 K.

| <b>Bias current<br/>(<math>\mu\text{A}</math>)</b> | <b>Speed Response <math>\Delta\tau</math><br/>(s)</b> | <b>Power consumption<br/>(mW)</b> |
|----------------------------------------------------|-------------------------------------------------------|-----------------------------------|
| 5(*)                                               | 202.6                                                 | --                                |
| 10(*)                                              | 755.4                                                 | 1.13                              |
| 20                                                 | 149.1                                                 | 0.61                              |
| 30                                                 | 63.3                                                  | 0.42                              |
| 40                                                 | 40.2                                                  | 0.38                              |

\* Temperature sensor in ohmic regime.

**Table S7.** Device sensitivity as a function of the bias current values.

| <b>Bias current<br/>(<math>\mu\text{A}</math>)</b> | <b>Sensitivity<br/>(mV/K)</b> |
|----------------------------------------------------|-------------------------------|
| 5(*)                                               | [-23, -1.4]                   |
| 10(*)                                              | [-24.2, -15.3]                |
| 20                                                 | -12.8                         |
| 30                                                 | -13.6                         |
| 40                                                 | -13.9                         |

\* Temperature sensor in ohmic regime.

**Table S8.** Energy consumption as a function of the temperature.

| <b>Temperature<br/>(K)</b> | <b>Energy (*)<br/>(<math>\mu\text{Wh}</math>)</b> |
|----------------------------|---------------------------------------------------|
| 260                        | 13.6                                              |
| 270                        | 11.2                                              |
| 280                        | 10                                                |
| 290                        | 8.1                                               |
| 300                        | 7.4                                               |
| 310                        | 6.7                                               |

(\*) Bias current of 20  $\mu\text{A}$ .
